# Supplementary material for: The role of ionic liquids in the synthesis of the high-temperature superconductor YBa2Cu3O7−δ
Source: Royal Society of Chemistry journal article supplement (doi:10.1039/c8ce01275j), 2018-01-01
Supplement: c8ce01275j1.pdf [file c8ce01275j1.pdf]

## Supporting Information

|        |                                                                           |
|--------|---------------------------------------------------------------------------|
| 63257  | Ba(CO <sub>3</sub> )                                                      |
| 15196  | Ba(CO <sub>3</sub> )                                                      |
| 261703 | Ba(C <sub>2</sub> O <sub>4</sub> )                                        |
| 65801  | BaCuO <sub>2</sub>                                                        |
| 262674 | BaCl <sub>2</sub>                                                         |
| 35495  | Ba(NO <sub>3</sub> ) <sub>2</sub>                                         |
| 54129  | (CuO <sub>2</sub> ) <sub>4</sub>                                          |
| 54126  | CuO <sub>2</sub>                                                          |
| 69757  | CuO                                                                       |
| 188351 | Cu <sub>6</sub> O <sub>8</sub> YCl                                        |
| 27772  | Y <sub>2</sub> O <sub>3</sub>                                             |
| 202877 | Y <sub>2</sub> Cu <sub>2</sub> O <sub>5</sub>                             |
| 39456  | Y <sub>0.98</sub> Ba <sub>1.98</sub> Cu <sub>2.91</sub> O <sub>6.47</sub> |
| 67860  | YBa <sub>2</sub> Cu <sub>2.78</sub> O <sub>7</sub>                        |
| 62463  | YBa <sub>2</sub> Cu <sub>3</sub> O <sub>6.8</sub>                         |
| 68449  | YBa <sub>2</sub> Cu <sub>2.86</sub> O <sub>6.6</sub>                      |
| 39359  | YBa <sub>2</sub> Cu <sub>3</sub> O <sub>6.9</sub>                         |
| 67860  | YBa <sub>2</sub> Cu <sub>2.78</sub> O <sub>7</sub>                        |
| 62915  | YBa <sub>2</sub> Cu <sub>2.87</sub> O <sub>6.76</sub>                     |
| 32707  | Y <sub>2</sub> BaCuO <sub>5</sub>                                         |
| 65550  | Y <sub>0.5</sub> Ba <sub>3</sub> Cu <sub>1.5</sub> O <sub>5.5</sub>       |
| 65549  | Y <sub>0.25</sub> BaCu <sub>0.75</sub> O <sub>2.25</sub>                  |

**Table S1.** ICSD numbers (Left) with the corresponding crystal phases (Right)

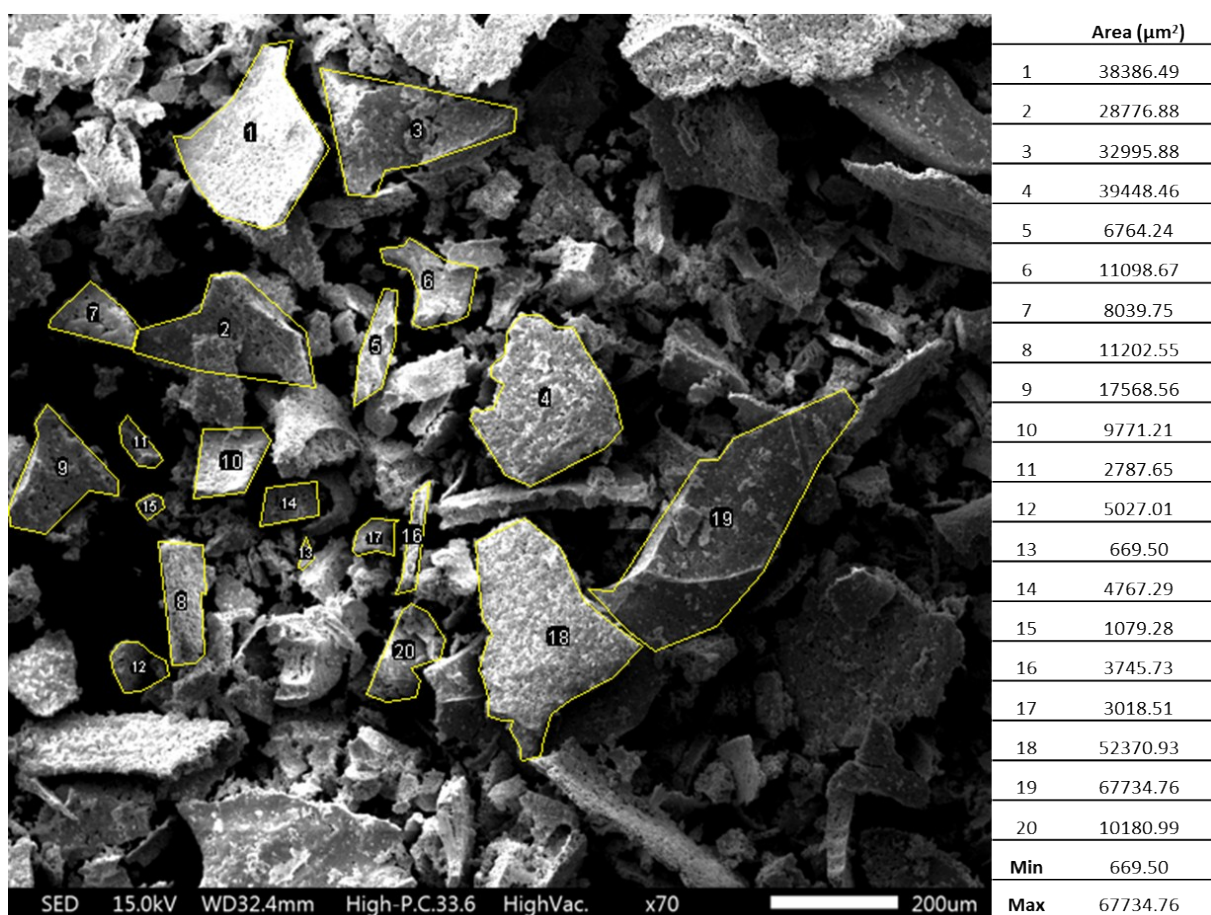

**Figure S1.** Scanning Electron Microscopy image of the superconductive YBCO sample. Highlighted the crystals chosen to be measured (Left). Table of their relative surfaces areas (Right)

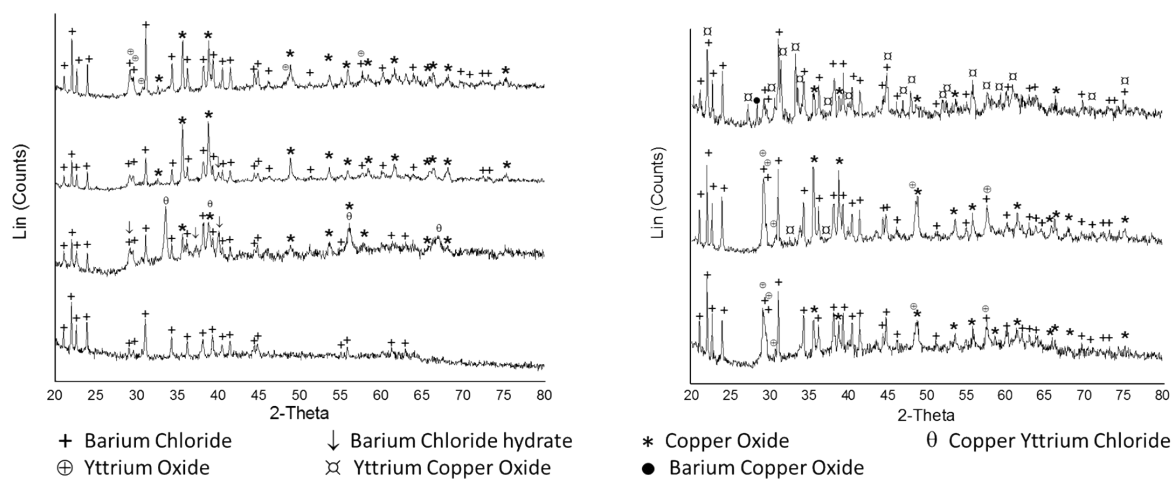

**Figure S2.** Temperature analysis via powder X-ray diffraction patterns of the synthesis of YBCO using ethylene glycol: choline chloride DES/dextran as chelating agent.

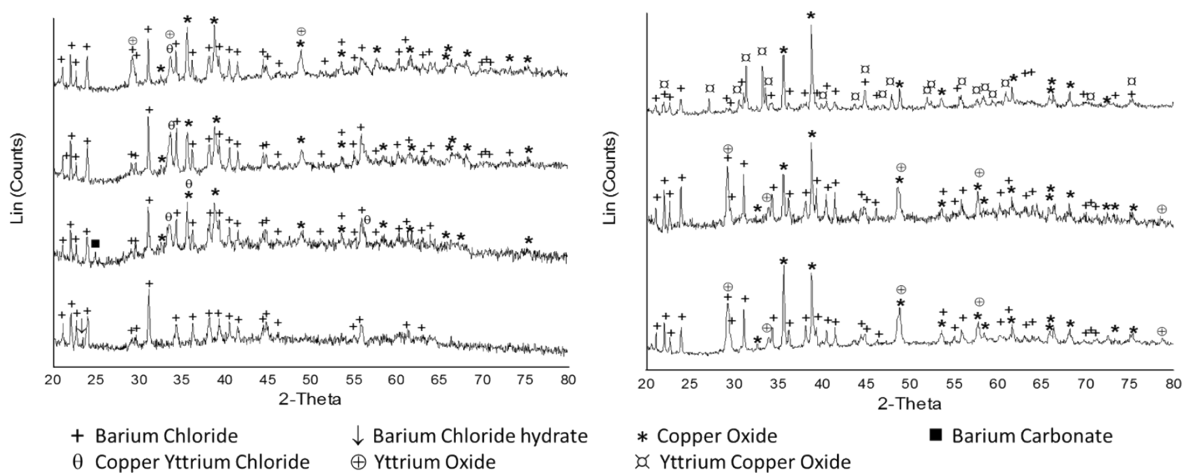

**Figure S3.** Temperature analysis via powder X-ray diffraction patterns of the synthesis of YBCO using imidazole: choline chloride DES/dextran as chelating agent.

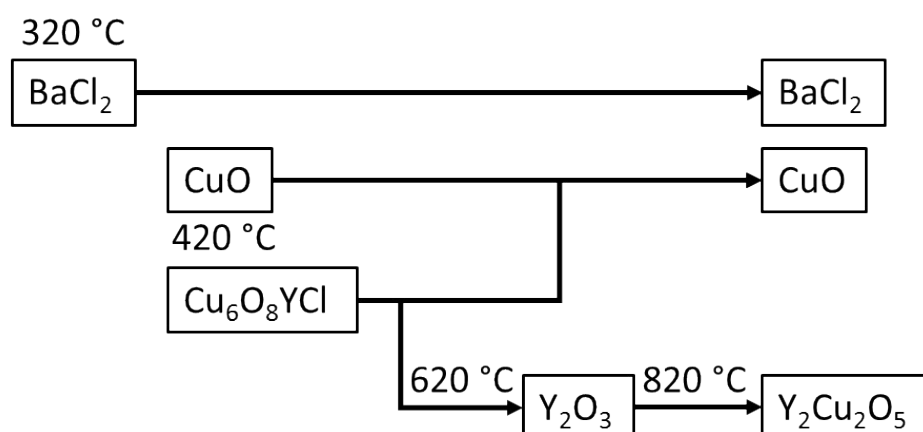

**Figure S4.** Diagram of crystal growth of the synthesis of YBCO using ethylene glycol: choline chloride DES/dextran and imidazole: choline chloride DES/dextran as chelating agents.

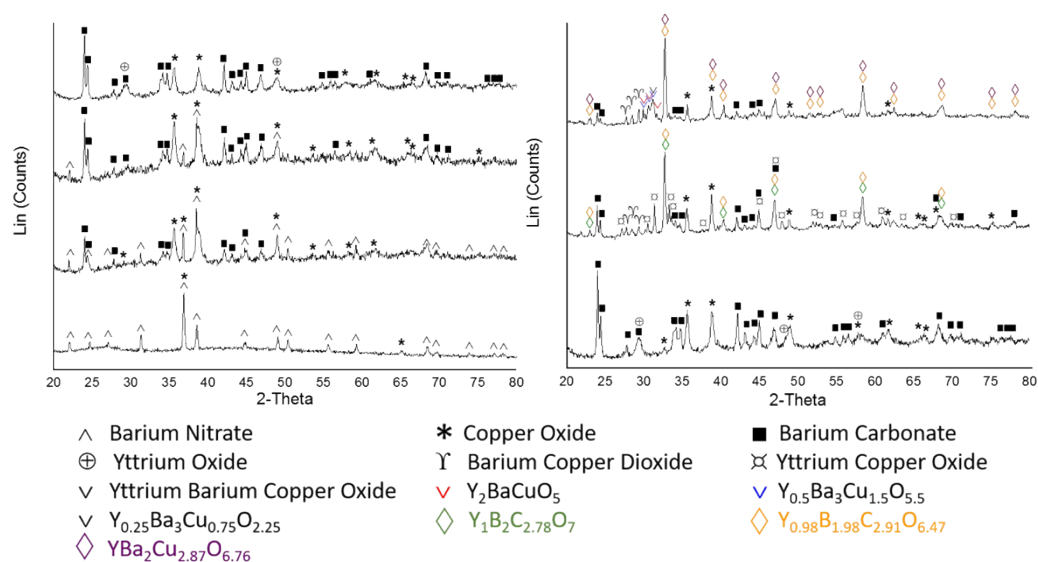

**Figure S5.** Temperature analysis via powder X-ray diffraction patterns of the synthesis of YBCO using imidazole/dextran as chelating agent.

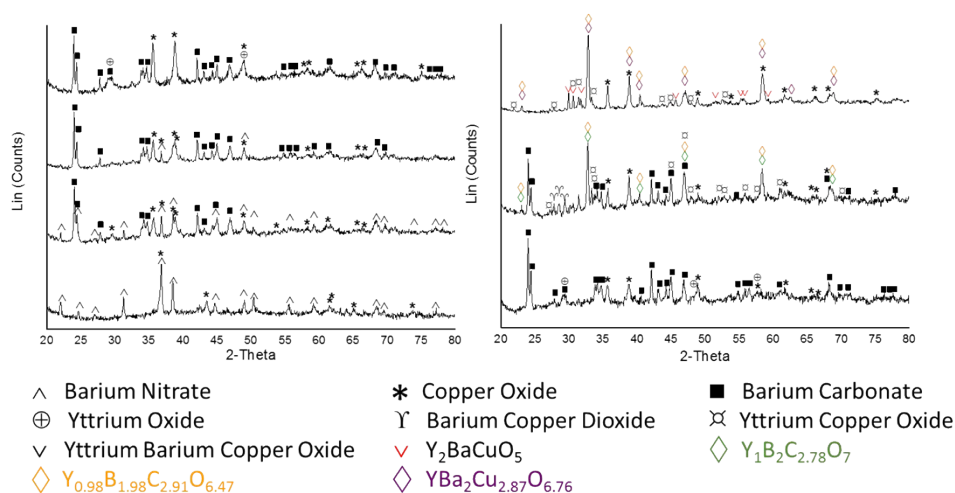

**Figure S6.** Temperature analysis via powder X-ray diffraction patterns of the synthesis of YBCO using ethylene glycol/dextran as chelating agent.

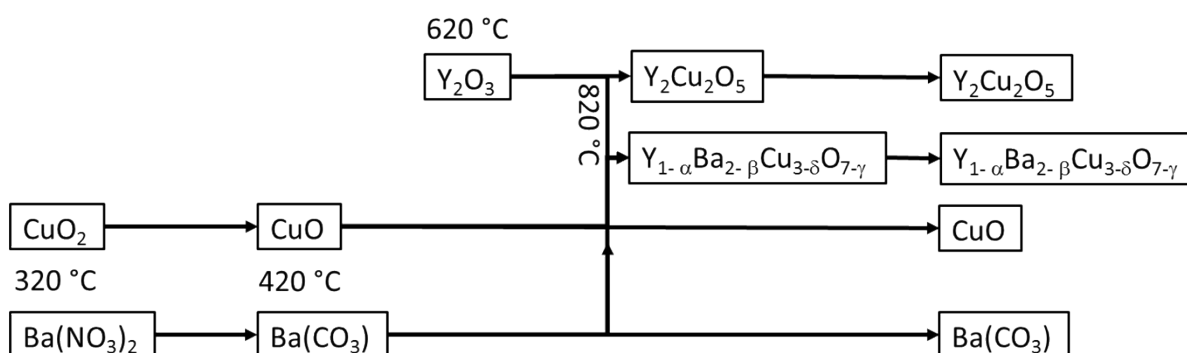

**Figure S7.** Diagram of crystal growth of the synthesis of YBCO using ethylene glycol/dextran and imidazole/dextran as chelating agents.
